# Supplementary material for: Interactions of Opuntia ficus-indica with Dactylopius coccus and D. opuntiae (Hemiptera: Dactylopiidae) through the Study of Their Volatile Compounds
Source: MDPI journal article supplement (doi:10.3390/plants13070963), 2024-03-27
Supplement: s1 [file s1]

# Interactions of *Opuntia ficus-indica* and *Dactylopius coccus* or *D. opuntiae* (Hemiptera: Dactylopiidae) through the study of its volatile compounds

Rodríguez-Leyva E.<sup>1</sup>, García-Pascual E.<sup>2</sup>, González-Chávez M. M. <sup>3\*</sup>, Méndez-Gallegos S. de J.<sup>2\*</sup>, Morales-Rueda J. A.<sup>4</sup>, Posadas-Hurtado J. C.<sup>3</sup>, Bravo-Vinaja A.<sup>2</sup>, Franco-Vega A.<sup>3</sup>

- 1 Colegio de Postgraduados, Posgrado en Fitosanidad, Entomología y Acarología, Campus Montecillo, CP 56264 Texcoco, Estado de México, México.
  - 2 Colegio de Postgraduados, Posgrado en Innovación en Manejo de Recursos Naturales, Campus San Luis Potosí, CP 78622 Salinas de Hidalgo, San Luis Potosí, México.
  - 3 Universidad Autónoma de San Luis Potosí, Facultad de Ciencias Químicas. Dr. Manuel Nava Martínez #6, Zona Universitaria, C.P.78210, San Luis Potosí, San Luis Potosí, México; gmm@uaslp.mx
  - 4 Viscoelabs. Material Research Center. Av. Real de Lomas No. 350 local 113, Lomas 4ta sección, CP 78216 San Luis Potosí, México.
- \* Correspondence: M.M.G.-C. gmm@uaslp.mx; Tel.: +52 4448262300 Ext.6471; S. J. M.-G. [jmendez@colpos.mx](mailto:jmendez@colpos.mx) Tel.: +52 4969630240 Ext. 4030

## SUPPORTING INFORMATION

### List of Contents

|                                                                                                                                                                                         |    |
|-----------------------------------------------------------------------------------------------------------------------------------------------------------------------------------------|----|
| <b>Table S1.</b> Yields of essential oils of <i>Dactylopius</i> species and <i>Opuntia</i> varieties.....                                                                               | 2  |
| <b>Table S2.</b> SIMPER analysis of <i>Dactylopius</i> species.....                                                                                                                     | 2  |
| <b>Table S3.</b> SIMPER analysis of <i>Opuntia</i> varieties. ....                                                                                                                      | 6  |
| <b>Table S4.</b> SIMPER analysis of <i>Opuntia ficus-indica</i> (OFI) Esmeralda and OFI Esmeralda infested by <i>Dactylopius coccus</i> .....                                           | 9  |
| <b>Table S5.</b> SIMPER analysis of OFI Rojo Pelón and OFI Rojo Pelón infested by <i>Dactylopius opuntiae</i> ...                                                                       | 12 |
| <b>Figure S1.</b> Comparison of volatilomes of the OFI Rojo Pelón uninfested and infested by <i>D. opuntiae</i> using Venn diagram. ....                                                | 15 |
| <b>Figure S2.</b> Comparison of volatilomes of the OFI Esmeralda uninfested and infested by <i>D. coccus</i> using Venn diagram. ....                                                   | 15 |
| <b>Figure S3.</b> <i>Dactylopius opuntiae</i> compounds grouped. The data are presented as the mean of the peak area of each compound (grouped by type) and the range of the data. .... | 16 |
| <b>Figure S4.</b> <i>Dactylopius coccus</i> compounds grouped. The data are presented as the mean of the peak area of each compound (grouped by type) and the range of the data. ....   | 17 |
| <b>Figure S5.</b> OFI Rojo Pelón compounds grouped. The data are presented as the mean of the peak area of each compound (grouped by type) and the range of the data.....               | 17 |
| <b>Figure S6.</b> OFI Esmeralda compounds grouped. The data are presented as the mean of the peak area of each compound (grouped by type) and the range of the data.....                | 18 |

**Table S1.** Yields of essential oils of *Dactylopius* species and *Opuntia* varieties.

| Essential oils                                                          | Amount obtained (mg) | Yield (%) |
|-------------------------------------------------------------------------|----------------------|-----------|
| <i>Dactylopius coccus</i>                                               | 106.7                | 0.11      |
| <i>Dactylopius opuntiae</i>                                             | 102.0                | 0.10      |
| <i>Opuntia ficusindica</i> Esmeralda                                    | 127.1                | 0.01      |
| <i>Opuntia ficusindica</i> Esmeralda<br>infested by <i>D. coccus</i>    | 126.6                | 0.01      |
| <i>Opuntia ficusindica</i> Rojo Pelón                                   | 138.6                | 0.01      |
| <i>Opuntia ficusindica</i> Rojo Pelón<br>infested by <i>D. opuntiae</i> | 201.9                | 0.02      |

**Table S2.** SIMPER analysis of *Dactylopius* species

| Compounds                     | Average dissimilarity | Contribution % | Cumulative % |
|-------------------------------|-----------------------|----------------|--------------|
| Ethyl octanoate               | 0.4484                | 2.128          | 2.128        |
| p-Cymene                      | 0.4484                | 2.128          | 4.255        |
| Benzylmethylether             | 0.4484                | 2.128          | 6.383        |
| Benzophenone                  | 0.4484                | 2.128          | 8.511        |
| Butanedioic acid              | 0.4484                | 2.128          | 10.64        |
| Glycolic acid                 | 0.4484                | 2.128          | 12.77        |
| Ethyl Benzoate                | 0.4484                | 2.128          | 14.89        |
| Ethyl decanoate               | 0.4484                | 2.128          | 17.02        |
| β-Ionone                      | 0.4484                | 2.128          | 19.15        |
| 2-Ethylhexanol                | 0.4484                | 2.128          | 21.28        |
| Ethyl hexadecanoate           | 0.4484                | 2.128          | 23.4         |
| Octanal                       | 0.4484                | 2.128          | 25.53        |
| Octadecane                    | 0.4484                | 2.128          | 27.66        |
| Ethyl nonanoate               | 0.4484                | 2.128          | 29.79        |
| Decanal                       | 0.4484                | 2.128          | 31.91        |
| Dodecanal                     | 0.4484                | 2.128          | 34.04        |
| 2,4-dimethylnonanoic acid     | 0.4484                | 2.128          | 36.17        |
| Phenol                        | 0.4484                | 2.128          | 38.3         |
| Ethyl octadecanoate           | 0.4484                | 2.128          | 40.43        |
| α-Ionone                      | 0.4484                | 2.128          | 42.55        |
| 2,4-dimethylhexanoic acid     | 0.4484                | 2.128          | 44.68        |
| Ethyl tetradecanoate          | 0.4484                | 2.128          | 46.81        |
| Ethyl tetradecanoate          | 0.4484                | 2.128          | 48.94        |
| Nonanedioic acid              | 0.4484                | 2.128          | 51.06        |
| 2-Decenoic acid               | 0.4484                | 2.128          | 53.19        |
| 1-Tridecene                   | 0.4484                | 2.128          | 55.32        |
| 1-Tridecanol                  | 0.4484                | 2.128          | 57.45        |
| 2,3,4-Trimethylpentanoic acid | 0.4484                | 2.128          | 59.57        |
| 2-Nonadecanone                | 0.4484                | 2.128          | 61.7         |
| Tridecanoic acid              | 0.4484                | 2.128          | 63.83        |
| 1-Octadecanol                 | 0.4484                | 2.128          | 65.96        |
| 2-methylhexanoic acid         | 0.4484                | 2.128          | 68.09        |
| (Z)-9-Hexadecenoic acid       | 0.4484                | 2.128          | 70.21        |
| 2,6-dimethylheptanoic acid    | 0.4484                | 2.128          | 72.34        |
| Undecanoic acid               | 0.4484                | 2.128          | 74.47        |
| Heptadecanoic acid            | 0.4484                | 2.128          | 76.6         |
| Heneicosane                   | 0.4484                | 2.128          | 78.72        |
| Ethyl Dodecanoate             | 0.4484                | 2.128          | 80.85        |
| Hexanoic acid                 | 0.4484                | 2.128          | 82.98        |

|                                                   |          |          |       |
|---------------------------------------------------|----------|----------|-------|
| Heptadecanal                                      | 0.4484   | 2.128    | 85.11 |
| Heptanal                                          | 0.4484   | 2.128    | 87.23 |
| Hexanal                                           | 0.4484   | 2.128    | 89.36 |
| cis-5-Dodecenoic acid                             | 0.4484   | 2.128    | 91.49 |
| 1-Tetradecanol                                    | 0.4484   | 2.128    | 93.62 |
| 1-Hexadecanol                                     | 0.4484   | 2.128    | 95.74 |
| Dodecanoic acid                                   | 0.4484   | 2.128    | 97.87 |
| 2-Ethylhexanoic acid                              | 0.4484   | 2.128    | 100   |
| Tetradecanoic acid                                | 1.86E-09 | 8.82E-09 | 100   |
| Decanoic acid                                     | 1.33E-09 | 6.32E-09 | 100   |
| a-Hexylcinnamaldehyde                             | 1.12E-09 | 5.30E-09 | 100   |
| Lactic acid                                       | 9.86E-10 | 4.68E-09 | 100   |
| 1-Dodecanol                                       | 8.81E-10 | 4.18E-09 | 100   |
| Hexadecanoic acid                                 | 7.50E-10 | 3.56E-09 | 100   |
| (Z,Z)-9,12-Octadecadienoic acid                   | 6.12E-10 | 2.90E-09 | 100   |
| Nonanal                                           | 4.66E-10 | 2.21E-09 | 100   |
| (Z)-9-Octadecenoic acid                           | 3.38E-10 | 1.61E-09 | 100   |
| Dehydroabietic acid                               | 3.05E-10 | 1.45E-09 | 100   |
| Nonanoic acid                                     | 2.61E-10 | 1.24E-09 | 100   |
| Benzoic acid                                      | 2.09E-10 | 9.91E-10 | 100   |
| Octadecanoic acid                                 | 1.86E-10 | 8.82E-10 | 100   |
| Hexadecane                                        | 1.44E-10 | 6.84E-10 | 100   |
| (Z)-4-tert-butylcyclohexyl acetate                | 1.42E-10 | 6.74E-10 | 100   |
| Hexylsalicylate                                   | 1.00E-10 | 4.76E-10 | 100   |
| Heptanoic acid                                    | 9.19E-11 | 4.36E-10 | 100   |
| Octanoic acid                                     | 6.27E-11 | 2.97E-10 | 100   |
| (Z)-9-Tetradecenoic acid                          | 4.18E-11 | 1.98E-10 | 100   |
| p-Hydroxybenzoic acid                             | 3.97E-11 | 1.88E-10 | 100   |
| p-Hydroxybenzoic acid                             | 3.97E-11 | 1.88E-10 | 100   |
| 3-Ethoxy-4-hydroxybenzaldehyde                    | 0        | 0        | 100   |
| Heptadecane                                       | 0        | 0        | 100   |
| 4-Hydroxy-3-methoxybenzaldehyde                   | 0        | 0        | 100   |
| 3-(4-(tert-butyl)phenyl)-2-methylpropanal         | 0        | 0        | 100   |
| Octacosanol                                       | 0        | 0        | 100   |
| Nonanaldimethylacetal                             | 0        | 0        | 100   |
| Salicylic acid                                    | 0        | 0        | 100   |
| 3,7,11,15-Tetramethyl-2-hexadecenol               | 0        | 0        | 100   |
| Phenylacetaldehyde                                | 0        | 0        | 100   |
| p-Vinylguaiacol                                   | 0        | 0        | 100   |
| 2,5-Dimethoxybenzenemethanol acetate              | 0        | 0        | 100   |
| Benzeneacetic acid                                | 0        | 0        | 100   |
| 4-Methylvaleric acid                              | 0        | 0        | 100   |
| 5,5-Dimethyl-3-oxo-1-cyclohexene-1-carboxaldehyde | 0        | 0        | 100   |
| 1-Octanol                                         | 0        | 0        | 100   |
| Diethyl acetal hexanal                            | 0        | 0        | 100   |
| Benzylalcohol                                     | 0        | 0        | 100   |
| Benzaldehyde                                      | 0        | 0        | 100   |
| Heptanol                                          | 0        | 0        | 100   |
| Hexanol                                           | 0        | 0        | 100   |

|                                            |   |   |     |
|--------------------------------------------|---|---|-----|
| β-Sitosterol                               | 0 | 0 | 100 |
| Glutaric acid                              | 0 | 0 | 100 |
| Neophytadiene                              | 0 | 0 | 100 |
| Dihydroactinidiolide                       | 0 | 0 | 100 |
| Methyl octadecanoate                       | 0 | 0 | 100 |
| Methyl 2-methoxy benzoate                  | 0 | 0 | 100 |
| 2-Hexenoic acid                            | 0 | 0 | 100 |
| α-Isomethylionone                          | 0 | 0 | 100 |
| β-Damascenone                              | 0 | 0 | 100 |
| 28-Nor-17β(H)-hopane                       | 0 | 0 | 100 |
| Nerol                                      | 0 | 0 | 100 |
| 1,2-Dihydroxy-4-methylpentane              | 0 | 0 | 100 |
| 2-Methoxybenzoic acid                      | 0 | 0 | 100 |
| (Z)-2-Hexen-1-ol                           | 0 | 0 | 100 |
| Geraniol                                   | 0 | 0 | 100 |
| Linalool                                   | 0 | 0 | 100 |
| α-Terpineol                                | 0 | 0 | 100 |
| β-Linalool                                 | 0 | 0 | 100 |
| 15-Methylhexadecanoic acid                 | 0 | 0 | 100 |
| Guaiacol                                   | 0 | 0 | 100 |
| Nonanol                                    | 0 | 0 | 100 |
| Glycerol                                   | 0 | 0 | 100 |
| Glyceric acid                              | 0 | 0 | 100 |
| 1-Methyl-1(4-methyl-3-cyclohexenyl)ethanol | 0 | 0 | 100 |
| Isododecanol                               | 0 | 0 | 100 |
| Methyl benzoate                            | 0 | 0 | 100 |
| 1,5,5-Trimethyl-3-methylene cyclohexene    | 0 | 0 | 100 |
| trans-Linalool oxide                       | 0 | 0 | 100 |
| Linalool oxide                             | 0 | 0 | 100 |
| Limonene                                   | 0 | 0 | 100 |
| Benzyl salicylate                          | 0 | 0 | 100 |
| 1,2-Dihydro-1,1,6-trimethylnaphthalene     | 0 | 0 | 100 |
| 10,18,Bisnorabieta-8,11,13.triene          | 0 | 0 | 100 |
| 1-(1-cyclohexen-1-yl)-(1-1-Butenone)       | 0 | 0 | 100 |
| Isopropyl tetradecanoate                   | 0 | 0 | 100 |
| Nonadecane                                 | 0 | 0 | 100 |
| Eicosane                                   | 0 | 0 | 100 |
| 2-(1-Hydroxybut-2-enylidene)cyclohexanone  | 0 | 0 | 100 |
| 4-Oxoisophorone                            | 0 | 0 | 100 |
| Pentadecanoic acid                         | 0 | 0 | 100 |
| Heptanoic acid                             | 0 | 0 | 100 |
| Phenylacetone                              | 0 | 0 | 100 |
| Isophorone                                 | 0 | 0 | 100 |
| Nonanedioic acid                           | 0 | 0 | 100 |
| Acetophenone                               | 0 | 0 | 100 |
| 2,2,6-Trimethylcyclohexanone               | 0 | 0 | 100 |
| Ethyl salicylate                           | 0 | 0 | 100 |
| 5-Hexen-2-one                              | 0 | 0 | 100 |
| 1,2-Dimethoxybenzene                       | 0 | 0 | 100 |
| Benzyl Benzoate                            | 0 | 0 | 100 |

|                                                                     |   |   |     |
|---------------------------------------------------------------------|---|---|-----|
| 2,3-Dihydro-2,2,4,6-tetramethylbenzofuran                           | 0 | 0 | 100 |
| Methyl benzoate                                                     | 0 | 0 | 100 |
| Lactic acid                                                         | 0 | 0 | 100 |
| 3-Hydroxy-2-methylpyran-4-one                                       | 0 | 0 | 100 |
| 3-Ethyl-4-methyl-1H-pyrrole-2,5-dione                               | 0 | 0 | 100 |
| 3-Isobutyl-2-methoxypyrazine                                        | 0 | 0 | 100 |
| Ethyl 2-(5-methyl-5-vinyltetrahydrofuran-2-yl)propan-2-yl carbonate | 0 | 0 | 100 |
| 12-Methyltridecanoic acid                                           | 0 | 0 | 100 |
| 2-Nonenoic acid                                                     | 0 | 0 | 100 |
| 2-Methoxy-3-isopropylpyrazine                                       | 0 | 0 | 100 |
| 2-Isopropyl-3-metoxypirazina                                        | 0 | 0 | 100 |
| Octadecanal                                                         | 0 | 0 | 100 |
| Docosane                                                            | 0 | 0 | 100 |
| Methyl tetradecanoate                                               | 0 | 0 | 100 |
| Methyl salicylate                                                   | 0 | 0 | 100 |
| 2-Methyl-4-pentenoic acid                                           | 0 | 0 | 100 |
| 4-Oxopentanoic acid                                                 | 0 | 0 | 100 |
| 3-Methyl-2-pentenoic acid                                           | 0 | 0 | 100 |
| Heptanoic acid                                                      | 0 | 0 | 100 |
| Phenylacetone                                                       | 0 | 0 | 100 |
| Isophorone                                                          | 0 | 0 | 100 |
| Nonanedioic acid                                                    | 0 | 0 | 100 |
| Acetophenone                                                        | 0 | 0 | 100 |
| 2,2,6-Trimethylcyclohexanone                                        | 0 | 0 | 100 |
| Ethyl salicylate                                                    | 0 | 0 | 100 |
| 5-Hexen-2-one                                                       | 0 | 0 | 100 |
| 1,2-Dimethoxybenzene                                                | 0 | 0 | 100 |
| Benzyl Benzoate                                                     | 0 | 0 | 100 |
| 2,3-Dihydro-2,2,4,6-tetramethylbenzofuran                           | 0 | 0 | 100 |
| Methyl benzoate                                                     | 0 | 0 | 100 |
| Lactic acid                                                         | 0 | 0 | 100 |
| 3-Hydroxy-2-methylpyran-4-one                                       | 0 | 0 | 100 |
| 3-Ethyl-4-methyl-1H-pyrrole-2,5-dione                               | 0 | 0 | 100 |
| 3-Isobutyl-2-methoxypyrazine                                        | 0 | 0 | 100 |
| Ethyl 2-(5-methyl-5-vinyltetrahydrofuran-2-yl)propan-2-yl carbonate | 0 | 0 | 100 |
| 12-Methyltridecanoic acid                                           | 0 | 0 | 100 |
| 2-Nonenoic acid                                                     | 0 | 0 | 100 |
| 2-Methoxy-3-isopropylpyrazine                                       | 0 | 0 | 100 |
| 2-Isopropyl-3-metoxypirazina                                        | 0 | 0 | 100 |
| Octadecanal                                                         | 0 | 0 | 100 |
| Docosane                                                            | 0 | 0 | 100 |

|                                                                     |   |   |     |
|---------------------------------------------------------------------|---|---|-----|
| Methyl tetradecanoate                                               | 0 | 0 | 100 |
| Methyl salicylate                                                   | 0 | 0 | 100 |
| 2-Methyl-4-pentenoic acid                                           | 0 | 0 | 100 |
| 4-Oxopentanoic acid                                                 | 0 | 0 | 100 |
| 3-Methyl-2-pentenoic acid                                           | 0 | 0 | 100 |
| 3-Isobutyl-2-methoxypyrazine                                        | 0 | 0 | 100 |
| Ethyl 2-(5-methyl-5-vinyltetrahydrofuran-2-yl)propan-2-yl carbonate | 0 | 0 | 100 |
| 12-Methyltridecanoic acid                                           | 0 | 0 | 100 |
| 2-Nonenoic acid                                                     | 0 | 0 | 100 |
| 2-Methoxy-3-isopropylpyrazine                                       | 0 | 0 | 100 |
| 2-Isopropyl-3-metoxypirazina                                        | 0 | 0 | 100 |
| Octadecanal                                                         | 0 | 0 | 100 |
| Docosane                                                            | 0 | 0 | 100 |
| Methyl tetradecanoate                                               | 0 | 0 | 100 |
| Methyl salicylate                                                   | 0 | 0 | 100 |
| 2-Methyl-4-pentenoic acid                                           | 0 | 0 | 100 |
| 4-Oxopentanoic acid                                                 | 0 | 0 | 100 |
| 3-Methyl-2-pentenoic acid                                           | 0 | 0 | 100 |

**Table S3.** SIMPER analysis of *Opuntia ficus-indica* varieties.

| Compounds                           | Average dissimilarity | Contribution % | Cumulative % |
|-------------------------------------|-----------------------|----------------|--------------|
| 4-Oxoisophorone                     | 0.5005                | 1.088          | 1.088        |
| β-Damascenone                       | 0.5005                | 1.088          | 2.175        |
| β-Ionone                            | 0.5005                | 1.088          | 3.263        |
| Nerol                               | 0.5005                | 1.088          | 4.351        |
| Acetophenone                        | 0.5005                | 1.088          | 5.438        |
| 2-Nonenoic acid                     | 0.5005                | 1.088          | 6.526        |
| Glycerol                            | 0.5005                | 1.088          | 7.614        |
| 3,7,11,15-Tetramethyl-2-hexadecenol | 0.5005                | 1.088          | 8.702        |
| Decanal                             | 0.4978                | 1.082          | 9.783        |
| Methyl benzoate                     | 0.4978                | 1.082          | 10.87        |
| Benzyl Benzoate                     | 0.4978                | 1.082          | 11.95        |
| Linalool                            | 0.4978                | 1.082          | 13.03        |
| Hexadecane                          | 0.4878                | 1.06           | 14.09        |
| Phenol                              | 0.4878                | 1.06           | 15.15        |
| Nonanal dimethylacetal              | 0.4878                | 1.06           | 16.21        |
| Diethyl acetal hexanal              | 0.4878                | 1.06           | 17.27        |
| Hexylsalicylate                     | 0.4878                | 1.06           | 18.33        |
| Dihydroactinidiolide                | 0.4878                | 1.06           | 19.39        |
| 2-Hexenoic acid                     | 0.4878                | 1.06           | 20.45        |
| Pentadecanoic acid                  | 0.4878                | 1.06           | 21.51        |
| Hexanal                             | 0.4878                | 1.06           | 22.57        |
| 2-Methoxy-3-isopropylpyrazine       | 0.4878                | 1.06           | 23.63        |
| Hexanoic acid                       | 0.4878                | 1.06           | 24.69        |
| β-Linalool                          | 0.4878                | 1.06           | 25.75        |
| Lactic acid                         | 0.4878                | 1.06           | 26.81        |
| β-Sitosterol                        | 0.4878                | 1.06           | 27.87        |

|                                                   |        |        |       |
|---------------------------------------------------|--------|--------|-------|
| Linalool oxide                                    | 0.4878 | 1.06   | 28.93 |
| Ethyl Benzoate                                    | 0.4242 | 0.9217 | 29.85 |
| Isopropyl tetradecanoate                          | 0.4242 | 0.9217 | 30.77 |
| Hexanol                                           | 0.4242 | 0.9217 | 31.7  |
| Tridecanoic acid                                  | 0.4242 | 0.9217 | 32.62 |
| 12-Methyltridecanoic acid                         | 0.4242 | 0.9217 | 33.54 |
| Nonanol                                           | 0.4242 | 0.9217 | 34.46 |
| 3-Hydroxy-2-methylpyran-4-one                     | 0.4242 | 0.9217 | 35.38 |
| Isododecanol                                      | 0.4242 | 0.9217 | 36.3  |
| $\alpha$ -Ionona                                  | 0.4242 | 0.9217 | 37.23 |
| 2-Methoxybenzoic acid                             | 0.4242 | 0.9217 | 38.15 |
| Ethyl tetradecanoate                              | 0.4242 | 0.9217 | 39.07 |
| Heptanol                                          | 0.4242 | 0.9217 | 39.99 |
| 3-Ethoxy-4-hydroxybenzaldehyde                    | 0.4242 | 0.9217 | 40.91 |
| 2-Methyl-4-pentenoic acid                         | 0.4242 | 0.9217 | 41.83 |
| Ethyl octadecanoate                               | 0.4242 | 0.9217 | 42.76 |
| Heptadecane                                       | 0.4242 | 0.9217 | 43.68 |
| 5,5-Dimethyl-3-oxo-1-cyclohexene-1-carboxaldehyde | 0.4242 | 0.9217 | 44.6  |
| 4-Methylvaleric acid                              | 0.4242 | 0.9217 | 45.52 |
| 1,2-Dimethoxybenzene                              | 0.4242 | 0.9217 | 46.44 |
| Heptanal                                          | 0.4242 | 0.9217 | 47.37 |
| 2-Isopropyl-3-metoxypirazina                      | 0.4242 | 0.9217 | 48.29 |
| 1,2-Dihydroxy-4-methylpentane                     | 0.4242 | 0.9217 | 49.21 |
| 3-(4-(tert-butyl)phenyl)-2-methylpropanal         | 0.4242 | 0.9217 | 50.13 |
| Benzyl salicylate                                 | 0.4242 | 0.9217 | 51.05 |
| Octadecanal                                       | 0.4242 | 0.9217 | 51.97 |
| Guaiacol                                          | 0.4242 | 0.9217 | 52.9  |
| 3-Ethyl-4-methyl-1H-pyrrole-2,5-dione             | 0.4242 | 0.9217 | 53.82 |
| Nonadecane                                        | 0.4242 | 0.9217 | 54.74 |
| Neophytadiene                                     | 0.4242 | 0.9217 | 55.66 |
| Methyl 2-methoxy benzoate                         | 0.4242 | 0.9217 | 56.58 |
| 1-Methyl-1(4-methyl-3-cyclohexenyl)ethanol        | 0.4242 | 0.9217 | 57.5  |
| 1-Tetradecanol                                    | 0.4242 | 0.9217 | 58.43 |
| $\alpha$ -Isomethylionone                         | 0.4242 | 0.9217 | 59.35 |
| 1-Octadecanol                                     | 0.4242 | 0.9217 | 60.27 |
| Ethyl salicylate                                  | 0.4242 | 0.9217 | 61.19 |
| Octanoic acid                                     | 0.4242 | 0.9217 | 62.11 |
| $\alpha$ -Hexylcinnamaldehyde                     | 0.4242 | 0.9217 | 63.04 |
| Methyl benzoate                                   | 0.4242 | 0.9217 | 63.96 |
| trans-Linalool oxide                              | 0.4242 | 0.9217 | 64.88 |
| (Z)-2-Hexen-1-ol                                  | 0.3781 | 0.8217 | 65.7  |
| Octanal                                           | 0.3781 | 0.8217 | 66.52 |
| Benzaldehyde                                      | 0.3781 | 0.8217 | 67.34 |
| 1-Octanol                                         | 0.3781 | 0.8217 | 68.17 |
| Glutaric acid                                     | 0.3781 | 0.8217 | 68.99 |
| 15-Methylhexadecanoic acid                        | 0.3781 | 0.8217 | 69.81 |
| 1,2-Dihydro-1,1,6-trimethylnaphthalene            | 0.3781 | 0.8217 | 70.63 |
| 4-Oxopentanoic acid                               | 0.3781 | 0.8217 | 71.45 |

|                                                                             |          |          |       |
|-----------------------------------------------------------------------------|----------|----------|-------|
| Nonanedioic acid                                                            | 0.3781   | 0.8217   | 72.27 |
| 5-Hexen-2-one                                                               | 0.3781   | 0.8217   | 73.1  |
| Benzylmethylether                                                           | 0.3781   | 0.8217   | 73.92 |
| 3-Methyl-2-pentenoic acid                                                   | 0.3781   | 0.8217   | 74.74 |
| Butanedioic acid                                                            | 0.3781   | 0.8217   | 75.56 |
| 1,5,5-Trimethyl-3-methylene<br>cyclohexene                                  | 0.3781   | 0.8217   | 76.38 |
| 10,18,Bisnorabieta-                                                         |          |          |       |
| 8,11,13.triene                                                              | 0.3781   | 0.8217   | 77.2  |
| 1-(1-cyclohexen-1-yl)(-1-1-<br>Butenone)                                    | 0.3781   | 0.8217   | 78.03 |
| Glyceric acid                                                               | 0.3781   | 0.8217   | 78.85 |
| Methyl tetradecanoate                                                       | 0.3781   | 0.8217   | 79.67 |
| Limonene                                                                    | 0.3781   | 0.8217   | 80.49 |
| p-Hydroxybenzoic acid                                                       | 0.3781   | 0.8217   | 81.31 |
| $\alpha$ -Terpineol                                                         | 0.3781   | 0.8217   | 82.13 |
| Methyl salicylate                                                           | 0.3492   | 0.7587   | 82.89 |
| Geraniol                                                                    | 0.3492   | 0.7587   | 83.65 |
| 2-Ethylhexanoic acid                                                        | 0.3492   | 0.7587   | 84.41 |
| 2,5-Dimethoxy                                                               |          |          |       |
| benzenemethanol acetate                                                     | 0.3492   | 0.7587   | 85.17 |
| 2-(1-Hydroxybut-2-<br>enylidene)cyclohexanone                               | 0.3492   | 0.7587   | 85.93 |
| 2,2,6-                                                                      |          |          |       |
| Trimethylcyclohexanone                                                      | 0.3492   | 0.7587   | 86.69 |
| Eicosane                                                                    | 0.3492   | 0.7587   | 87.45 |
| Heneicosane                                                                 | 0.3492   | 0.7587   | 88.2  |
| Docosane                                                                    | 0.3492   | 0.7587   | 88.96 |
| Methyl octadecanoate                                                        | 0.3492   | 0.7587   | 89.72 |
| 3-Isobutyl-2-                                                               |          |          |       |
| methoxy pyrazine                                                            | 0.3492   | 0.7587   | 90.48 |
| 28-Nor-17 $\beta$ (H)-hopane                                                | 0.3492   | 0.7587   | 91.24 |
| Ethyl 2-(5-methyl-5-<br>vinyltetrahydrofuran-2-<br>yl)propan-2-yl carbonate | 0.3492   | 0.7587   | 92    |
| Isophorone                                                                  | 0.3348   | 0.7275   | 92.73 |
| 1-Hexadecanol                                                               | 0.3348   | 0.7275   | 93.45 |
| Benzophenone                                                                | 0.3348   | 0.7275   | 94.18 |
| Ethyl Dodecanoate                                                           | 0.3348   | 0.7275   | 94.91 |
| Benzeneacetic acid                                                          | 0.3348   | 0.7275   | 95.64 |
| Salicylic acid                                                              | 0.3348   | 0.7275   | 96.36 |
| 2,3-Dihydro-2,2,4,6-<br>tetramethylbenzofuran                               | 0.3348   | 0.7275   | 97.09 |
| 1-Dodecanol                                                                 | 0.3348   | 0.7275   | 97.82 |
| Decanoic acid                                                               | 0.3348   | 0.7275   | 98.55 |
| Octacosanol                                                                 | 0.3348   | 0.7275   | 99.27 |
| (Z)-9-Octadecenoic acid                                                     | 0.3348   | 0.7275   | 100   |
| p-Vinylguaiacol                                                             | 3.04E-09 | 6.60E-09 | 100   |
| Dehydroabietic acid                                                         | 2.16E-09 | 4.69E-09 | 100   |
| Dodecanoic acid                                                             | 9.91E-10 | 2.15E-09 | 100   |
| Hexadecanoic acid                                                           | 8.76E-10 | 1.90E-09 | 100   |
| Tetradecanoic acid                                                          | 4.79E-10 | 1.04E-09 | 100   |
| Octadecanoic acid                                                           | 3.99E-10 | 8.68E-10 | 100   |
| 2-Ethylhexanol                                                              | 3.82E-10 | 8.30E-10 | 100   |
| Benzoic acid                                                                | 3.65E-10 | 7.93E-10 | 100   |
| 4-Hydroxy-3-                                                                |          |          |       |
| methoxybenzaldehyde                                                         | 3.34E-10 | 7.25E-10 | 100   |
| Benzylalcohol                                                               | 3.12E-10 | 6.79E-10 | 100   |



|                                 |          |          |     |
|---------------------------------|----------|----------|-----|
| (Z,Z)-9,12-Octadecadienoic acid | 2.73E-10 | 5.93E-10 | 100 |
| Nonanal                         | 2.21E-10 | 4.79E-10 | 100 |
| Nonanoic acid                   | 1.89E-10 | 4.11E-10 | 100 |
| Phenylacetone                   | 6.50E-11 | 1.41E-10 | 100 |
| Heptanoic acid                  | 5.70E-11 | 1.24E-10 | 100 |
| Phenylacetaldehyde              | 5.66E-11 | 1.23E-10 | 100 |
| Undecanoic acid                 | 1.46E-11 | 3.17E-11 | 100 |

**Table S4.** SIMPER analysis of *Opuntia ficus-indica* (OFI) Esmeralda and OFI Esmeralda infested by *Dactylopius coccus*.

| Compounds                                         | Average dissimilarity | Contribution % | Cumulative % |
|---------------------------------------------------|-----------------------|----------------|--------------|
| Isopropyl tetradecanoate                          | 0.9434                | 1.389          | 1.389        |
| Ethyl Benzoate                                    | 0.9434                | 1.389          | 2.778        |
| Tridecanoic acid                                  | 0.9434                | 1.389          | 4.167        |
| Hexanol                                           | 0.9434                | 1.389          | 5.556        |
| Nonanol                                           | 0.9434                | 1.389          | 6.944        |
| 3-Hydroxy-2-methylpyran-4-one                     | 0.9434                | 1.389          | 8.333        |
| 12-Methyltridecanoic acid                         | 0.9434                | 1.389          | 9.722        |
| $\alpha$ -Ionone                                  | 0.9434                | 1.389          | 11.11        |
| Isododecanol                                      | 0.9434                | 1.389          | 12.5         |
| 2-Methoxybenzoic acid                             | 0.9434                | 1.389          | 13.89        |
| Ethyl tetradecanoate                              | 0.9434                | 1.389          | 15.28        |
| 3-Ethoxy-4-hydroxybenzaldehyde                    | 0.9434                | 1.389          | 16.67        |
| 2-Methyl-4-pentenoic acid                         | 0.9434                | 1.389          | 18.06        |
| Heptanol                                          | 0.9434                | 1.389          | 19.44        |
| Ethyl octadecanoate                               | 0.9434                | 1.389          | 20.83        |
| Heptadecane                                       | 0.9434                | 1.389          | 22.22        |
| 4-Oxoisophorone                                   | 0.9434                | 1.389          | 23.61        |
| Decanal                                           | 0.9434                | 1.389          | 25           |
| 4-Methylvaleric acid                              | 0.9434                | 1.389          | 26.39        |
| Benzaldehyde                                      | 0.9434                | 1.389          | 27.78        |
| 5,5-Dimethyl-3-oxo-1-cyclohexene-1-carboxaldehyde | 0.9434                | 1.389          | 29.17        |
| Glutaric acid                                     | 0.9434                | 1.389          | 30.56        |
| 1,2-Dimethoxybenzene                              | 0.9434                | 1.389          | 31.94        |
| 15-Methylhexadecanoic acid                        | 0.9434                | 1.389          | 33.33        |
| Octanal                                           | 0.9434                | 1.389          | 34.72        |
| 1,2-Dihydro-1,1,6-trimethylnaphthalene            | 0.9434                | 1.389          | 36.11        |
| $\beta$ -Damascenone                              | 0.9434                | 1.389          | 37.5         |
| Heptanal                                          | 0.9434                | 1.389          | 38.89        |
| Linalool                                          | 0.9434                | 1.389          | 40.28        |
| 4-Oxopentanoic acid                               | 0.9434                | 1.389          | 41.67        |
| 2-Isopropyl-3-metoxypirazina                      | 0.9434                | 1.389          | 43.06        |
| 1,2-Dihydroxy-4-methylpentane                     | 0.9434                | 1.389          | 44.44        |
| Nonanedioic acid                                  | 0.9434                | 1.389          | 45.83        |
| 1-Octanol                                         | 0.9434                | 1.389          | 47.22        |
| 5-Hexen-2-one                                     | 0.9434                | 1.389          | 48.61        |

|                                            |          |          |       |
|--------------------------------------------|----------|----------|-------|
| 3-(4-(tert-butyl)phenyl)-2-methylpropanal  | 0.9434   | 1.389    | 50    |
| Benzyl salicylate                          | 0.9434   | 1.389    | 51.39 |
| Benzylmethylether                          | 0.9434   | 1.389    | 52.78 |
| Octadecanal                                | 0.9434   | 1.389    | 54.17 |
| Glycerol                                   | 0.9434   | 1.389    | 55.56 |
| Nerol                                      | 0.9434   | 1.389    | 56.94 |
| Guaiacol                                   | 0.9434   | 1.389    | 58.33 |
| 3-Ethyl-4-methyl-1H-pyrrole-2,5-dione      | 0.9434   | 1.389    | 59.72 |
| 3-Methyl-2-pentenoic acid                  | 0.9434   | 1.389    | 61.11 |
| (Z)-2-Hexen-1-ol                           | 0.9434   | 1.389    | 62.5  |
| Nonadecane                                 | 0.9434   | 1.389    | 63.89 |
| Neophytadiene                              | 0.9434   | 1.389    | 65.28 |
| $\beta$ -Ionone                            | 0.9434   | 1.389    | 66.67 |
| Methyl benzoate                            | 0.9434   | 1.389    | 68.06 |
| Methyl 2-methoxy benzoate                  | 0.9434   | 1.389    | 69.44 |
| Butanedioic acid                           | 0.9434   | 1.389    | 70.83 |
| 1,5,5-Trimethyl-3-methylene cyclohexene    | 0.9434   | 1.389    | 72.22 |
| Acetophenone                               | 0.9434   | 1.389    | 73.61 |
| 10,18-Bisnorabieta-8,11,13-triene          | 0.9434   | 1.389    | 75    |
| 1-Methyl-1(4-methyl-3-cyclohexenyl)ethanol | 0.9434   | 1.389    | 76.39 |
| 1-Tetradecanol                             | 0.9434   | 1.389    | 77.78 |
| 1-(1-cyclohexen-1-yl)-(-1-Butenone)        | 0.9434   | 1.389    | 79.17 |
| Glyceric acid                              | 0.9434   | 1.389    | 80.56 |
| Methyl tetradecanoate                      | 0.9434   | 1.389    | 81.94 |
| Limonene                                   | 0.9434   | 1.389    | 83.33 |
| 2-Nonenoic acid                            | 0.9434   | 1.389    | 84.72 |
| $\alpha$ -Isomethylionone                  | 0.9434   | 1.389    | 86.11 |
| 1-Octadecanol                              | 0.9434   | 1.389    | 87.5  |
| p-Hydroxybenzoic acid                      | 0.9434   | 1.389    | 88.89 |
| Ethyl salicylate                           | 0.9434   | 1.389    | 90.28 |
| $\alpha$ -Hexylcinnamaldehyde              | 0.9434   | 1.389    | 91.67 |
| Octanoic acid                              | 0.9434   | 1.389    | 93.06 |
| Methyl benzoate                            | 0.9434   | 1.389    | 94.44 |
| 3,7,11,15-Tetramethyl-2-hexadecenol        | 0.9434   | 1.389    | 95.83 |
| $\alpha$ -Terpineol                        | 0.9434   | 1.389    | 97.22 |
| Benzyl Benzoate                            | 0.9434   | 1.389    | 98.61 |
| trans-Linalool oxide                       | 0.9434   | 1.389    | 100   |
| p-Vinylguaiacol                            | 3.89E-09 | 5.73E-09 | 100   |
| Methyl salicylate                          | 2.53E-09 | 3.72E-09 | 100   |
| $\beta$ -Linalool                          | 2.08E-09 | 3.07E-09 | 100   |
| Linalool oxide                             | 1.50E-09 | 2.21E-09 | 100   |
| Dodecanoic acid                            | 1.29E-09 | 1.90E-09 | 100   |
| Hexadecanoic acid                          | 1.02E-09 | 1.49E-09 | 100   |
| Tetradecanoic acid                         | 7.12E-10 | 1.05E-09 | 100   |
| Lactic acid                                | 6.99E-10 | 1.03E-09 | 100   |
| Benzoic acid                               | 5.27E-10 | 7.76E-10 | 100   |
| (Z,Z)-9,12-Octadecadienoic acid            | 3.82E-10 | 5.63E-10 | 100   |
| Octadecanoic acid                          | 3.38E-10 | 4.98E-10 | 100   |
| 1-Hexadecanol                              | 3.30E-10 | 4.85E-10 | 100   |
| Dehydroabietic acid                        | 2.94E-10 | 4.33E-10 | 100   |

|                                                                     |          |          |     |
|---------------------------------------------------------------------|----------|----------|-----|
| Hexadecane                                                          | 2.72E-10 | 4.01E-10 | 100 |
| 4-Hydroxy-3-methoxybenzaldehyde                                     | 2.28E-10 | 3.36E-10 | 100 |
| Nonanal                                                             | 2.20E-10 | 3.23E-10 | 100 |
| (Z)-9-Octadecenoic acid                                             | 1.80E-10 | 2.65E-10 | 100 |
| 2-Ethylhexanol                                                      | 1.58E-10 | 2.33E-10 | 100 |
| Nonanoic acid                                                       | 1.45E-10 | 2.13E-10 | 100 |
| 2-Hexenoic acid                                                     | 1.32E-10 | 1.94E-10 | 100 |
| Benzylalcohol                                                       | 1.27E-10 | 1.88E-10 | 100 |
| Isophorone                                                          | 1.01E-10 | 1.49E-10 | 100 |
| Diethyl acetal hexanal                                              | 9.23E-11 | 1.36E-10 | 100 |
| Hexylsalicylate                                                     | 9.23E-11 | 1.36E-10 | 100 |
| Heptanoic acid                                                      | 8.79E-11 | 1.29E-10 | 100 |
| Nonanaldimethylacetal                                               | 7.03E-11 | 1.04E-10 | 100 |
| Decanoic acid                                                       | 6.15E-11 | 9.06E-11 | 100 |
| 1-Dodecanol                                                         | 5.71E-11 | 8.41E-11 | 100 |
| Geraniol                                                            | 4.83E-11 | 7.11E-11 | 100 |
| Ethyl Dodecanoate                                                   | 3.95E-11 | 5.82E-11 | 100 |
| Dihydroactinidiolide                                                | 3.51E-11 | 5.17E-11 | 100 |
| Phenol                                                              | 2.64E-11 | 3.88E-11 | 100 |
| Phenylacetaldehyde                                                  | 2.64E-11 | 3.88E-11 | 100 |
| Phenylacetone                                                       | 1.76E-11 | 2.59E-11 | 100 |
| Benzophenone                                                        | 1.32E-11 | 1.94E-11 | 100 |
| Hexanal                                                             | 1.32E-11 | 1.94E-11 | 100 |
| Undecanoic acid                                                     | 8.79E-12 | 1.29E-11 | 100 |
| Pentadecanoic acid                                                  | 4.39E-12 | 6.47E-12 | 100 |
| Hexanoic acid                                                       | 4.39E-12 | 6.47E-12 | 100 |
| Heneicosane                                                         | 0        | 0        | 100 |
| Eicosane                                                            | 0        | 0        | 100 |
| Octacosanol                                                         | 0        | 0        | 100 |
| Salicylic acid                                                      | 0        | 0        | 100 |
| 2,5-Dimethoxybenzenemethanol acetate                                | 0        | 0        | 100 |
| Benzeneacetic acid                                                  | 0        | 0        | 100 |
| $\beta$ -Sitosterol                                                 | 0        | 0        | 100 |
| 28-Nor-17 $\beta$ (H)-hopane                                        | 0        | 0        | 100 |
| Methyl octadecanoate                                                | 0        | 0        | 100 |
| 2-Ethylhexanoic acid                                                | 0        | 0        | 100 |
| 2-(1-Hydroxybut-2-enylidene)cyclohexanone                           | 0        | 0        | 100 |
| 2,2,6-Trimethylcyclohexanone                                        | 0        | 0        | 100 |
| 2,3-Dihydro-2,2,4,6-tetramethylbenzofuran                           | 0        | 0        | 100 |
| 3-Isobutyl-2-methoxypyrazine                                        | 0        | 0        | 100 |
| Ethyl 2-(5-methyl-5-vinyltetrahydrofuran-2-yl)propan-2-yl carbonate | 0        | 0        | 100 |
| 2-Methoxy-3-isopropylpyrazine                                       | 0        | 0        | 100 |
| Docosane                                                            | 0        | 0        | 100 |

**Table S5.** SIMPER analysis of OFI Rojo Pelón and OFI Rojo Pelón infested by *Dactylopius opuntiae*

| Compounds                                                           | Average dissimilarity | Contribution % | Cumulative % |
|---------------------------------------------------------------------|-----------------------|----------------|--------------|
| 4-Oxoisophorone                                                     | 0.5882                | 2.778          | 2.778        |
| 2-Ethylhexanoic acid                                                | 0.5882                | 2.778          | 5.556        |
| 2,5-Dimethoxy benzenemethanol acetate                               | 0.5882                | 2.778          | 8.333        |
| 2-(1-Hydroxybut-2-enylidene)cyclohexanone                           | 0.5882                | 2.778          | 11.11        |
| Decanal                                                             | 0.5882                | 2.778          | 13.89        |
| 2,2,6-Trimethylcyclohexanone                                        | 0.5882                | 2.778          | 16.67        |
| Benzyl Benzoate                                                     | 0.5882                | 2.778          | 19.44        |
| Benzeneacetic acid                                                  | 0.5882                | 2.778          | 22.22        |
| Isophorone                                                          | 0.5882                | 2.778          | 25           |
| Salicylic acid                                                      | 0.5882                | 2.778          | 27.78        |
| $\beta$ -Ionone                                                     | 0.5882                | 2.778          | 30.56        |
| Eicosane                                                            | 0.5882                | 2.778          | 33.33        |
| Heneicosane                                                         | 0.5882                | 2.778          | 36.11        |
| Docosane                                                            | 0.5882                | 2.778          | 38.89        |
| Methyl salicylate                                                   | 0.5882                | 2.778          | 41.67        |
| Methyl octadecanoate                                                | 0.5882                | 2.778          | 44.44        |
| Ethyl Dodecanoate                                                   | 0.5882                | 2.778          | 47.22        |
| 2-Nonenoic acid                                                     | 0.5882                | 2.778          | 50           |
| 2,3-Dihydro-2,2,4,6-tetramethylbenzofuran                           | 0.5882                | 2.778          | 52.78        |
| Benzophenone                                                        | 0.5882                | 2.778          | 55.56        |
| 3-Isobutyl-2-methoxypyrazine                                        | 0.5882                | 2.778          | 58.33        |
| Acetophenone                                                        | 0.5882                | 2.778          | 61.11        |
| 28-Nor-17 $\beta$ (H)-hopane                                        | 0.5882                | 2.778          | 63.89        |
| 1-Hexadecanol                                                       | 0.5882                | 2.778          | 66.67        |
| $\beta$ -Damascenone                                                | 0.5882                | 2.778          | 69.44        |
| 1-Dodecanol                                                         | 0.5882                | 2.778          | 72.22        |
| Nerol                                                               | 0.5882                | 2.778          | 75           |
| Decanoic acid                                                       | 0.5882                | 2.778          | 77.78        |
| Methyl benzoate                                                     | 0.5882                | 2.778          | 80.56        |
| Octacosanol                                                         | 0.5882                | 2.778          | 83.33        |
| Glycerol                                                            | 0.5882                | 2.778          | 86.11        |
| Geraniol                                                            | 0.5882                | 2.778          | 88.89        |
| (Z)-9-Octadecenoic acid                                             | 0.5882                | 2.778          | 91.67        |
| 3,7,11,15-Tetramethyl-2-hexadecenol                                 | 0.5882                | 2.778          | 94.44        |
| Linalool                                                            | 0.5882                | 2.778          | 97.22        |
| Ethyl 2-(5-methyl-5-vinyltetrahydrofuran-2-yl)propan-2-yl carbonate | 0.5882                | 2.778          | 100          |
| $\beta$ -Sitosterol                                                 | 1.70E-09              | 8.02E-09       | 100          |
| Dodecanoic acid                                                     | 1.33E-09              | 6.26E-09       | 100          |
| (Z)-2-Hexen-1-ol                                                    | 9.42E-10              | 4.45E-09       | 100          |
| p-Vinylguaiaicol                                                    | 6.46E-10              | 3.05E-09       | 100          |
| Octadecanoic acid                                                   | 5.94E-10              | 2.81E-09       | 100          |
| Benzoic acid                                                        | 4.27E-10              | 2.02E-09       | 100          |
| Tetradecanoic acid                                                  | 3.75E-10              | 1.77E-09       | 100          |

|                                                   |          |          |     |
|---------------------------------------------------|----------|----------|-----|
| (Z,Z)-9,12-Octadecadienoic acid                   | 3.62E-10 | 1.71E-09 | 100 |
| Benzylalcohol                                     | 3.23E-10 | 1.53E-09 | 100 |
| 4-Hydroxy-3-methoxybenzaldehyde                   | 3.18E-10 | 1.50E-09 | 100 |
| Hexadecanoic acid                                 | 3.01E-10 | 1.42E-09 | 100 |
| 2-Methoxy-3-isopropylpyrazine                     | 2.05E-10 | 9.70E-10 | 100 |
| 2-Ethylhexanol                                    | 1.75E-10 | 8.28E-10 | 100 |
| Nonanal                                           | 1.12E-10 | 5.30E-10 | 100 |
| Octanal                                           | 8.49E-11 | 4.01E-10 | 100 |
| Nonanoic acid                                     | 7.40E-11 | 3.49E-10 | 100 |
| 1-Octanol                                         | 6.57E-11 | 3.10E-10 | 100 |
| Benzaldehyde                                      | 6.30E-11 | 2.98E-10 | 100 |
| Ethyl Benzoate                                    | 4.38E-11 | 2.07E-10 | 100 |
| Heptanoic acid                                    | 3.84E-11 | 1.81E-10 | 100 |
| Octanoic acid                                     | 3.56E-11 | 1.68E-10 | 100 |
| Phenylacetone                                     | 2.19E-11 | 1.04E-10 | 100 |
| Dehydroabietic acid                               | 1.92E-11 | 9.06E-11 | 100 |
| Undecanoic acid                                   | 1.10E-11 | 5.17E-11 | 100 |
| Phenylacetaldehyde                                | 2.74E-12 | 1.29E-11 | 100 |
| 3-Ethoxy-4-hydroxybenzaldehyde                    | 0        | 0        | 100 |
| Heptadecane                                       | 0        | 0        | 100 |
| Hexylsalicylate                                   | 0        | 0        | 100 |
| 3-(4-(tert-butyl)phenyl)-2-methylpropanal         | 0        | 0        | 100 |
| 1,2-Dihydro-1,1,6-trimethylnaphthalene            | 0        | 0        | 100 |
| Nonanaldimethylacetal                             | 0        | 0        | 100 |
| p-Hydroxybenzoic acid                             | 0        | 0        | 100 |
| 1-Octadecanol                                     | 0        | 0        | 100 |
| 1-Tetradecanol                                    | 0        | 0        | 100 |
| Isododecanol                                      | 0        | 0        | 100 |
| 1-Methyl-1(4-methyl-3-cyclohexenyl)ethanol        | 0        | 0        | 100 |
| 4-Methylvaleric acid                              | 0        | 0        | 100 |
| 5,5-Dimethyl-3-oxo-1-cyclohexene-1-carboxaldehyde | 0        | 0        | 100 |
| Guaiacol                                          | 0        | 0        | 100 |
| Diethyl acetal hexanal                            | 0        | 0        | 100 |
| Heptanol                                          | 0        | 0        | 100 |
| Phenol                                            | 0        | 0        | 100 |
| Heptanal                                          | 0        | 0        | 100 |
| Hexanal                                           | 0        | 0        | 100 |
| 1,2-Dihydroxy-4-methylpentane                     | 0        | 0        | 100 |
| Glutaric acid                                     | 0        | 0        | 100 |
| Neophytadiene                                     | 0        | 0        | 100 |
| Ethyl octadecanoate                               | 0        | 0        | 100 |
| Dihydroactinidiolide                              | 0        | 0        | 100 |
| Methyl 2-methoxy benzoate                         | 0        | 0        | 100 |
| 2-Hexenoic acid                                   | 0        | 0        | 100 |
| $\alpha$ -Ionone                                  | 0        | 0        | 100 |
| 2-Methoxybenzoic acid                             | 0        | 0        | 100 |
| $\alpha$ -Terpineol                               | 0        | 0        | 100 |
| $\beta$ -Linalool                                 | 0        | 0        | 100 |

|                                            |   |   |     |
|--------------------------------------------|---|---|-----|
| 15-Methylhexadecanoic acid                 | 0 | 0 | 100 |
| Glyceric acid                              | 0 | 0 | 100 |
| $\alpha$ -Isomethylionone                  | 0 | 0 | 100 |
| 1,5,5-Trimethyl-3-methylene<br>cyclohexene | 0 | 0 | 100 |
| trans-Linalool oxide                       | 0 | 0 | 100 |
| Linalool oxide                             | 0 | 0 | 100 |
| Limonene                                   | 0 | 0 | 100 |
| Benzyl salicylate                          | 0 | 0 | 100 |
| Butanedioic acid                           | 0 | 0 | 100 |
| Hexanol                                    | 0 | 0 | 100 |
| 1-(1-cyclohexen-1-yl)(-1-1-<br>Butenone)   | 0 | 0 | 100 |
| Isopropyl tetradecanoate                   | 0 | 0 | 100 |
| Pentadecanoic acid                         | 0 | 0 | 100 |
| Nonanedioic acid                           | 0 | 0 | 100 |
| Ethyl tetradecanoate                       | 0 | 0 | 100 |
| Ethyl salicylate                           | 0 | 0 | 100 |
| 5-Hexen-2-one                              | 0 | 0 | 100 |
| Nonanol                                    | 0 | 0 | 100 |
| 1,2-Dimethoxybenzene                       | 0 | 0 | 100 |
| Benzylmethylether                          | 0 | 0 | 100 |
| Methyl benzoate                            | 0 | 0 | 100 |
| Lactic acid                                | 0 | 0 | 100 |
| 3-Hydroxy-2-methylpyran-<br>4-one          | 0 | 0 | 100 |
| 3-Ethyl-4-methyl-1H-<br>pyrrole-2,5-dione  | 0 | 0 | 100 |
| 12-Methyltridecanoic acid                  | 0 | 0 | 100 |
| 2-Isopropyl-3-<br>metoxypirazina           | 0 | 0 | 100 |
| Tridecanoic acid                           | 0 | 0 | 100 |
| Octadecanal                                | 0 | 0 | 100 |
| $\alpha$ -Hexylcinnamaldehyde              | 0 | 0 | 100 |
| 10,18,Bisnorabieta-<br>8,11,13.triene      | 0 | 0 | 100 |
| Hexadecane                                 | 0 | 0 | 100 |
| Methyl tetradecanoate                      | 0 | 0 | 100 |
| Nonadecane                                 | 0 | 0 | 100 |
| 2-Methyl-4-pentenoic acid                  | 0 | 0 | 100 |
| 4-Oxopentanoic acid                        | 0 | 0 | 100 |
| 3-Methyl-2-pentenoic acid                  | 0 | 0 | 100 |
| Hexanoic acid                              | 0 | 0 | 100 |

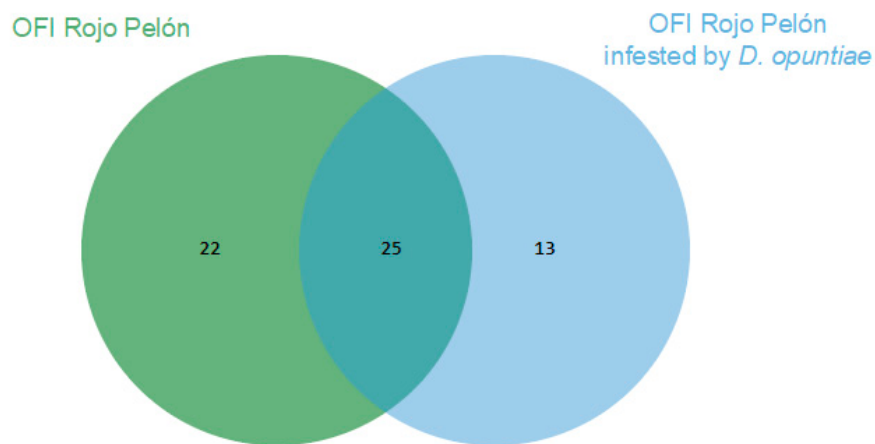

**Figure S1.** Comparison of volatiles of the *Opuntia ficus-indica* (OFI) Rojo Pelón uninfested and infested by *D. opuntiae* using Venn diagram.

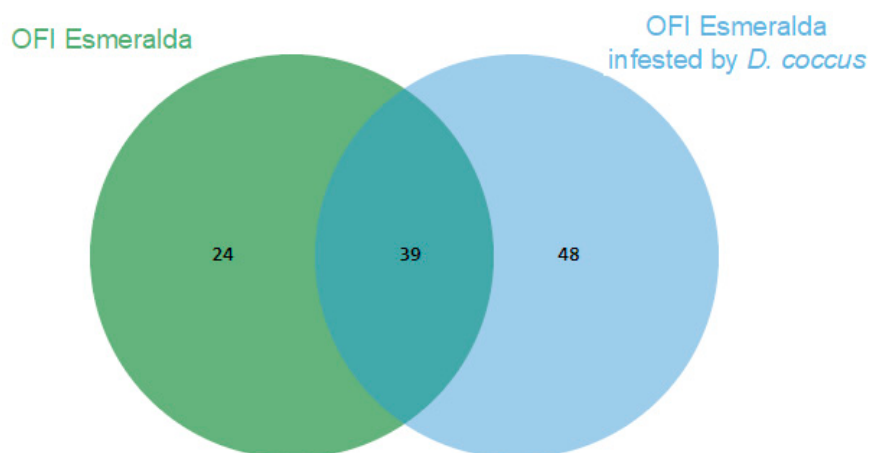

**Figure S2.** Comparison of volatiles of the *Opuntia ficus-indica* (OFI) Esmeralda uninfested and infested by *D. coccus* using Venn diagram.

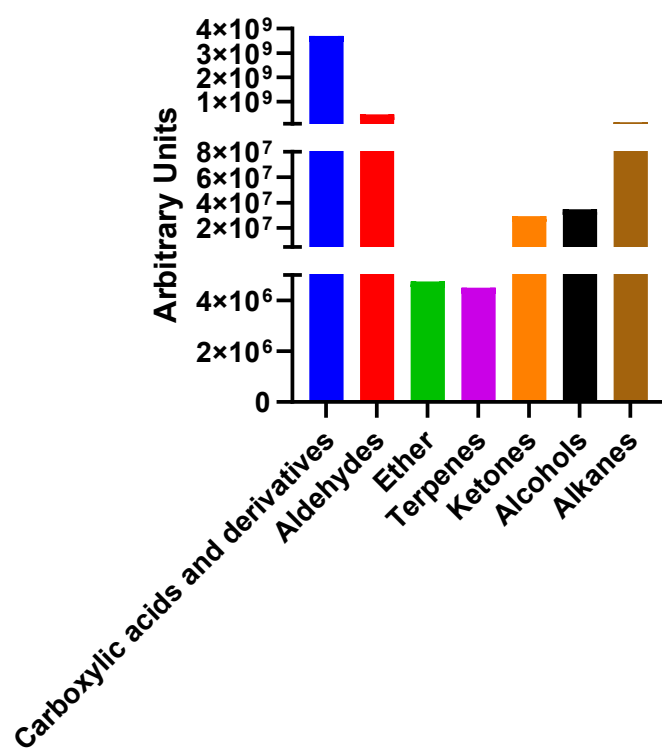

**Figure S3.** *Dactylopius opuntiae* compounds grouped. The data are presented as the mean of the peak area of each compound (grouped by type) and the range of the data.



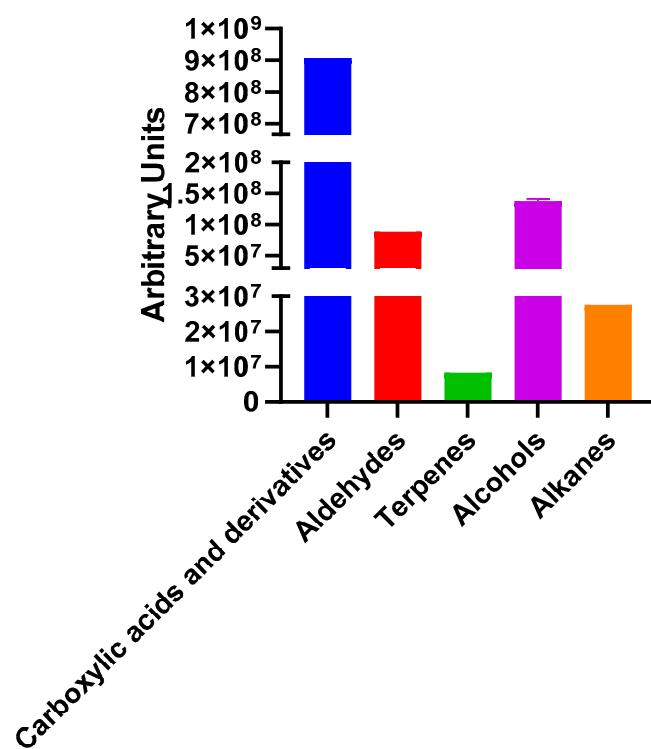

**Figure S4.** *Dactylopius coccus* compounds grouped. The data are presented as the mean of the peak area of each compound (grouped by type) and the range of the data.

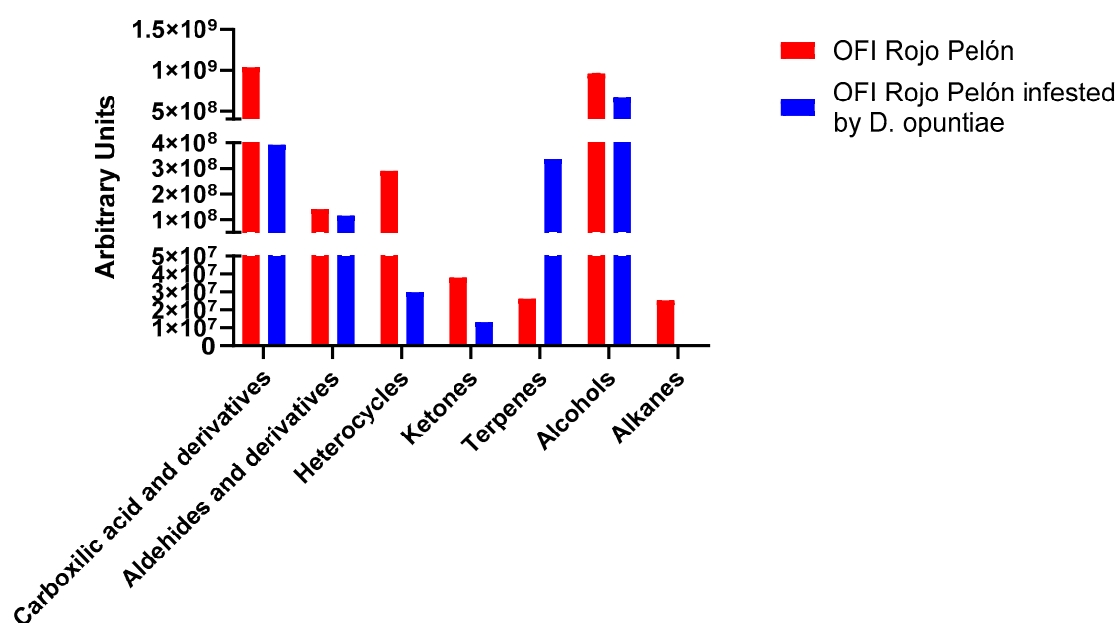

**Figure S5.** OFI Rojo Pelón compounds grouped. The data are presented as the mean of the peak area of each compound (grouped by type) and the range of the data.

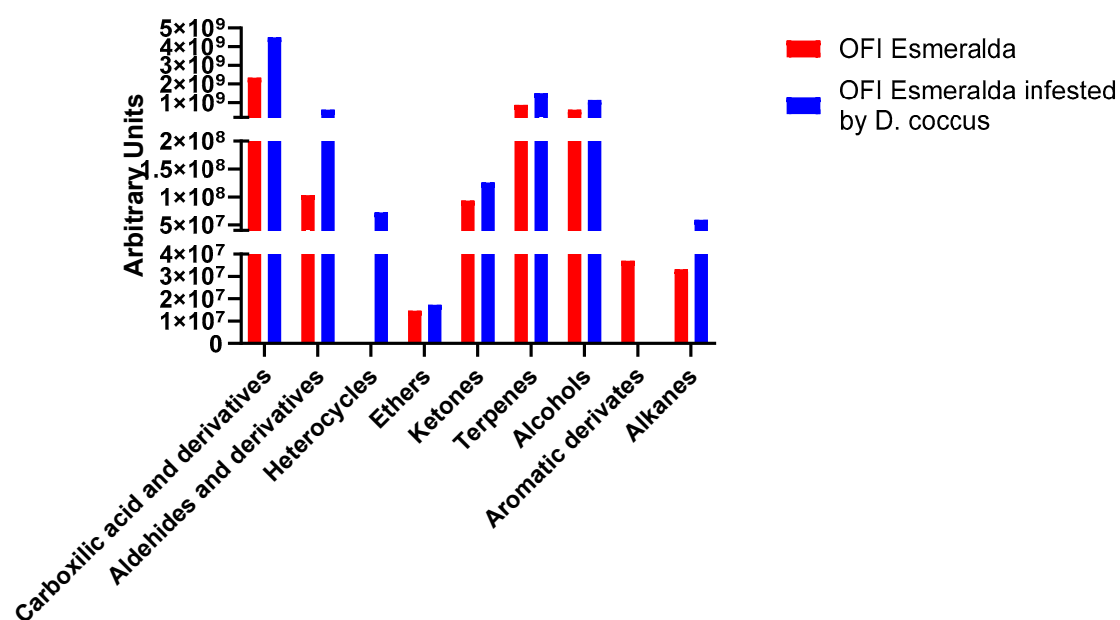

**Figure S6.** OFI Esmeralda compounds grouped. The data are presented as the mean of the peak area of each compound (grouped by type) and the range of the data.
